# Supplementary material
Source: Research Square preprint supplement (doi:10.21203/rs.3.rs-9384315/v1)
Supplement: Supplementary file 1 [file 330a940bbf22b055bad52296.docx]

**TERMS OF REFERENCE**

**Punjabi Advisory Board**

**Health and Wellness Lab**

**A. PURPOSE**

The Punjabi Advisory Board (‘the Board’) will engage with the Health and Wellness Lab core research team to co-create and provide recommendations on research questions and processes and delivery of the physical activity resources in Punjabi including the co-creation of a tailored exercise oncology intervention for Punjabi-speaking individuals of South Asian heritage. The Board provides the opportunity to integrate the collective ‘voice’ of Punjabi-speaking individuals living with cancer, clinicians, and qualified exercise professionals into the development of culturally-tailored exercise oncology resources.

**B. MANDATE**

The Board shall provide feedback on the following:

- Research questions
- Recruitment and outreach practices;
- Community building;
- Quality Improvement (QI) cycles;
- Punjabi educational and recruitment resources
- Punjabi exercise oncology intervention

**C. ROLE AND RESPONSIBILITIES**

The Board will:

- Provide a forum for individuals living with and beyond cancer and family members, clinicians, fitness professionals, and community partners to identify opportunities to improve the quality of delivery and implementation of a culturally tailored exercise oncology intervention.
- Advise on how to best meet the needs of participants within the tailored exercise oncology trial;
- Promote the inclusion of all voices in health care decision-making;
- Review key performance indicators for the tailored intervention, including indicators of quality and safety;
- Provide advice regarding potential challenges, gaps, and opportunities within the intervention.
- Have opportunity to contribute to and be consequently recognized on research outputs.

**D. MEMBERSHIP**

**1. Members**

The Board shall be appointed by members of the Health and Wellness Lab core research team. The Health and Wellness Lab core research team consists of the principal investigator and the research coordinator.

The Board membership may include a range of 4 to 5 additional individuals, which will be comprised of:

- Individuals living with and beyond cancer and/or family members
- Healthcare providers;
- Qualified exercise professionals
- Community organization representatives

All members are expected to:

- Participate in up to 4 meetings per year, 1 per quarter. Each meeting will be no more than 1 hour and held online via Zoom.
- Participate in potential projects between meetings *[Approximate time commitment of 2-8 hours total]*. Projects may include feedback on drafted documents, outreach activities, or other input to project activities.

Appointments will be made for a 1-year term with the option for renewal, not to exceed 2 years of total time served.

**2. Vacancy Management**

Vacancies on the Board shall be filled through appointment by the Health and Wellness Lab core research team.

**3. Remuneration of Cancer Provincial Advisory Council Members**

Members of the Board are not entitled to remuneration for acting as members.

**E. MEETINGS**

**1. Minutes**

- Minutes and agendas shall be prepared, and master copies of the minutes shall be retained by the Board coordinator and stored on a secure, online server.

**2. Quorum**

- A quorum shall be constituted by the presence of 50% (+1) of the members of the Board.
- Decisions shall be made based on discussions held.

**3. Support to the Board**

- Logistical and process support to the Board to be provided by the principal investigator and study coordinator.

**F. REPORTING**

The Board meeting minutes will be retained for reporting purposes.

**G. APPROVAL**

These Terms of Reference may be reviewed and updated for approval as required by the Board.
