# Supplementary material
Source: Research Square preprint supplement (doi:10.21203/rs.3.rs-9384315/v1)
Supplement: Supplementary file 2 [file 5cfec75434bd2589baa726e2.docx]

**Additional File 1.**

Guidance for Reporting Involvement of Patients and the Public 2 long-form (GRIPP2-SF) reporting checklist (Staniszewska et al., 2017).

| Section and Topic | Item | Reported on Page # |
| --- | --- | --- |
| 1: Aim | Report the aim of PPI in the study | 3-4 |
| 2: Methods | Provided a clear description of the methods used for PPI in the study | 4-17 |
| 3: Study Results | Outcomes – Report the results of PPI in the study, including both positive and negative outcomes | 17-18 |
| 4: Discussion and Conclusions | Outcomes – Comment on the extent to which PPI influenced the study overall. Describe positive and negative effects | 19-20 |
| 5: Reflections/Critical Perspective | Comment critically on the study, reflecting on things that went well and those that did not, so others can learn from this experience. | 19-20 |

*PPI patient and public involvement*
